# Supplementary material
Source: PubMed Central journal article supplement (PMC9579865)
Supplement: mmc1.pdf [file mmc1.pdf]

**Cell, Volume 185**

**Supplemental information**

**Deep mutational learning predicts ACE2 binding  
and antibody escape to combinatorial mutations  
in the SARS-CoV-2 receptor-binding domain**

**Joseph M. Taft, Cédric R. Weber, Beichen Gao, Roy A. Ehling, Jiami Han, Lester Frei, Sean W. Metcalfe, Max D. Overath, Alexander Yermanos, William Kelton, and Sai T. Reddy**

**SUPPLEMENTARY TABLES**

| Population                     | Antigen           | Events Screened | Binding Events Collected | Non-Binding Events Collected |
|--------------------------------|-------------------|-----------------|--------------------------|------------------------------|
| Library 2C                     | 50 nM ACE2        | 5.00E+07        | 1.60E+06                 | 6.40E+06                     |
| Library 2CE                    | 50 nM ACE2        | 5.00E+07        | 5.90E+05                 | 6.40E+06                     |
| Library 2C + 2CE, ACE2-binding | 100 nM REGN10933  | 1.07E+07        | 1.21E+06                 | 3.93E+05                     |
| Library 2C + 2CE, ACE2-binding | 100n nM RENG10987 | 1.02E+07        | 9.54E+05                 | 5.41E+05                     |
| Library 2C + 2CE, ACE2-binding | 100 nM Ly-CoV16   | 8.12E+06        | 5.07E+05                 | 6.92E+05                     |
| Library 2C + 2CE, ACE2-binding | 100 nM Ly-CoV555  | 1.13E+07        | 2.36E+04                 | 1.87E+06                     |
| Library 2T                     | 50 nM ACE2        | 1.52E+07        | 8.53E+05                 | 1.49E+06                     |
| Library 2T, ACE2-binding       | 100 nM REGN10933  | 1.94E+06        | 5.09E+05                 | 4.11E+04                     |
| Library 2T, ACE2-binding       | 100n nM RENG10987 | 2.43E+06        | 5.01E+05                 | 4.57E+04                     |
| Library 2T, ACE2-binding       | 100 nM Ly-CoV16   | 2.56E+06        | 5.66E+05                 | 1.13E+05                     |
| Library 2T, ACE2-binding       | 100 nM Ly-CoV555  | 3.15E+06        | 7.61E+05                 | 1.48E+05                     |

**Table S1. Sorting Statistics for RBD Library Sorting.** Events screened correspond to all detected events above the forward scatter threshold, including doublet cells. Binding and non-binding events include cells which are not. See Figs 2C,E and S1B

| Population                     | Antigen           | Paired and Filtered Reads |             |
|--------------------------------|-------------------|---------------------------|-------------|
|                                |                   | Binding                   | Non-Binding |
| Library 2C                     | 50 nM ACE2        | 1.20E+06                  | 1.16E+06    |
| Library 2CE                    | 50 nM ACE2        | 1.01E+06                  | 1.48E+06    |
| Library 2C + 2CE, ACE2 binding | 100 nM REGN10933  | 9.54E+05                  | 7.55E+05    |
| Library 2C + 2CE, ACE2 binding | 100n nM RENG10987 | 2.27E+05                  | 1.15E+04    |
| Library 2C + 2CE, ACE2 binding | 100 nM Ly-CoV16   | 1.85E+06                  | 2.98E+05    |
| Library 2C + 2CE, ACE2 binding | 100 nM Ly-CoV555  | 1.16E+05                  | 5.47E+05    |
| Library 123T                   | 50 nM ACE2        | 1.53E+06                  | 1.88E+06    |
| Library 123T, ACE2 binding     | 100 nM REGN10933  | 5.53E+06                  | 2.55E+06    |
| Library 123T, ACE2 binding     | 100n nM RENG10987 | 3.30E+06                  | 2.87E+06    |
| Library 123T, ACE2 binding     | 100 nM Ly-CoV16   | 1.59E+06                  | 3.20E+06    |
| Library 123T, ACE2 binding     | 100 nM Ly-CoV555  | 3.64E+06                  | 2.56E+06    |

**Table S2. Sequencing Statistics for RBD Library Sorting.** Reads were paired, merged, and trimmed using Geneious Prime and the bbdud plugin. See Fig 2D.

| Antibody                     | Class | Description                                                                                                                                                                                                                                                                                                           | Reference                              |
|------------------------------|-------|-----------------------------------------------------------------------------------------------------------------------------------------------------------------------------------------------------------------------------------------------------------------------------------------------------------------------|----------------------------------------|
| LY-CoV16<br>(Etesevimab)     | 1     | Neutralizing antibody used as part of the Eli-Lilly therapeutic antibody cocktail. Derived from convalescent COVID-19 patient samples. LY-CoV16 is no longer authorized for clinical use due to loss of neutralization to Omicron BA.1 or sublineages.                                                                | Shi et al. Nature. 2020                |
| LY-CoV555<br>(Bamlanivimab)  | 2     | Neutralizing antibody used as part of the Eli-Lilly therapeutic antibody cocktail. Identified through high-throughput screening of B cells from convalescent COVID-19 patient samples. LY-CoV555 is no longer authorized for clinical use due to loss of neutralization to Omicron BA.1 or sublineages.               | Jones et al. Science Transl. Med. 2021 |
| REGN10933<br>(Casirivimab)   | 1     | Neutralizing antibody used as part of the Regeneron COVID-19 therapeutic antibody cocktail. Derived from genetically humanized mice or convalescent human COVID-19 patient samples. REGN10933 is no longer authorized for clinical use due to loss of neutralization to Omicron BA.1 or sublineages.                  | Hansen et al. Science, 2020            |
| REGN10987<br>(Imdevimab)     | 3     | Neutralizing antibody used as part of the Regeneron COVID-19 therapeutic antibody cocktail. Derived from genetically humanized mice or convalescent human COVID-19 patient samples. REGN10987 is no longer authorized for clinical use due to loss of neutralization to Omicron BA.1 or sublineages.                  | Hansen et al. Science, 2020            |
| mAb-50                       | 3     | Neutralizing antibody isolated from expanded plasma cells of convalescent COVID-19 patients.                                                                                                                                                                                                                          | Ehling et al. Cell Rep, 2021.          |
| mAb-64                       | 1     | Neutralizing antibody isolated from expanded plasma cells of convalescent COVID-19 patients.                                                                                                                                                                                                                          | Ehling et al. Cell Rep, 2021.          |
| mAb-82                       | 1     | Neutralizing antibody isolated from expanded plasma cells of convalescent COVID-19 patients.                                                                                                                                                                                                                          | Ehling et al. Cell Rep, 2021.          |
| S309<br>(Sotrovimab)         | 3     | Neutralizing antibody used for treatment in the Vir/GSK therapeutic treatment. Originally isolated from B cells of a convalescent patient recovered from SARS-CoV-1 and with cross-reactivity to SARS-CoV-2. S309 is no longer authorized for clinical use due to loss of neutralization to the Omicron BA.2 variant. | Pinto et al. Nature, 2020              |
| S2E12                        | 1     | Neutralizing antibody with broad neutralization against a diverse clade of sabrecoviruses.                                                                                                                                                                                                                            | Starr et al. Nature, 2021              |
| S2H97                        | 4     | Neutralizing antibody with broad neutralization against a diverse clade of sabrecoviruses.                                                                                                                                                                                                                            | Starr et al. Nature, 2021              |
| LY-CoV1404<br>(Bebtelovimab) | 3     | Neutralizing antibody used in the Eli-Lilly therapeutic antibody treatment. Identified through high-throughput screening of B cells from convalescent COVID-19 patient samples. LY-CoV1404 remains authorized for clinical use due to effective neutralization to Omicron BA.1 and BA.2, BA.4 and BA.5 sublineages.   | Westendorf et al. Cell Rep, 2022       |
| A23-58.1                     | 1     | Neutralizing antibody isolated from B cells of convalescent COVID-19 patients and shown to have broad neutralization.                                                                                                                                                                                                 | Wang et al. Science, 2021              |
| G32A4                        | 1     | Neutralizing antibody isolated from B cells of convalescent COVID-19 patients and shown to have broad neutralization.                                                                                                                                                                                                 | Tong et al. Cell, 2021                 |

**Table S3.** List of antibodies screened by DML in this study. See Fig. 2.

| Random Forest                                                                                                                                                                                                                                                                                                             | RNN                                                                                                                                                                                                                                                                     |
|---------------------------------------------------------------------------------------------------------------------------------------------------------------------------------------------------------------------------------------------------------------------------------------------------------------------------|-------------------------------------------------------------------------------------------------------------------------------------------------------------------------------------------------------------------------------------------------------------------------|
| n_estimators = 500,<br>min_samples_split = 2,<br>min_samples_leaf = 1,<br>max_depth = 150,<br>max_features = 'sqrt',<br>criterion = gini<br><br>HP tuning parameters:<br>n_estimators: [50-500]<br>min_samples_split: [2,5,10]<br>min_samples_leaf: [1,2,5]<br>max_features: ['auto', 'sqrt']<br>max_depth: [20-150,None] | 3 sequential LSTM/Dropout layers<br>Dense layer 50 units<br>Sigmoid activation output<br>Cross-entropy loss<br><br>HP tuning parameters:<br>batch size: [16, 32]<br>epochs: [10, 20]<br>dropout rate: [0.1,0.2],<br>LSTM units: [40, 80],<br>optimizer: [adam, rmsprop] |

**Table S5. Key Metrics for Random Forest and RNN Models.** Hyperparameters were tuned through RandomSearchCV, scored for “precision”, using Sci-kit Learn for 50 rounds. For baseline models trained on ACE2 sequences, metrics evaluated include: total accuracy and F1, precision, and recall for both classes. Models were evaluated on the entirety of the held-out test set, without hyperparameter optimization. For final models, metrics evaluated include: total accuracy and F1, precision, and recall for the positive class. Models were evaluated on the entirety of the held-out test set, or “Low Distance” and “High Distance” subsets of the held-out test set. See Fig. 3.
